# Supplementary material for: A Randomized Trial to Assess Effectiveness and Safety of a Hyaluronic Acid Filler for Chin Augmentation and Correction of Chin Retrusion
Source: PubMed Central journal article supplement — Plast Reconstr Surg. 2022 Sep 20;150(6):1240–8. doi: 10.1097/PRS.0000000000009733 (PMC9698183; doi:10.1097/prs.0000000000009733), 2022-09-20
Supplement: prs-150-1240e-s002.pdf [file prs-150-1240e-s002.pdf]

## Supplemental Digital Content 2 Demographics

| Parameter Category                                                       | HARD<br>[N=107] | No treatment<br>[N=33] | Overall<br>[N=140] |
|--------------------------------------------------------------------------|-----------------|------------------------|--------------------|
| <b>Age (years)</b>                                                       |                 |                        |                    |
| Mean (SD)                                                                | 48.3 (12.39)    | 44.4 (15.30)           | 47.4 (13.18)       |
| Median                                                                   | 50.0            | 44.0                   | 49.5               |
| Min, Max                                                                 | 20, 70          | 22, 73                 | 20, 73             |
| <b>Sex, n (%)</b>                                                        |                 |                        |                    |
| Female                                                                   | 95 (88.8%)      | 30 (90.9%)             | 125 (89.3%)        |
| Male                                                                     | 12 (11.2%)      | 3 (9.1%)               | 15 (10.7%)         |
| <b>BMI (kg/m<sup>2</sup>)</b>                                            |                 |                        |                    |
| Mean (SD)                                                                | 24.32 (3.952)   | 24.59 (3.925)          | 24.38 (3.933)      |
| Median                                                                   | 23.62           | 24.74                  | 23.75              |
| Min, Max                                                                 | 17.9, 41.3      | 19.3, 32.5             | 17.9, 41.3         |
| <b>Race, n (%)</b>                                                       |                 |                        |                    |
| White                                                                    | 85 (79.4%)      | 22 (66.7%)             | 107 (76.4%)        |
| Black or African American                                                | 12 (11.2%)      | 5 (15.2%)              | 17 (12.1%)         |
| Asian                                                                    | 7 (6.5%)        | 2 (6.1%)               | 9 (6.4%)           |
| Native Hawaiian or Other Pacific Islander                                | 1 (0.9%)        | 0                      | 1 (0.7%)           |
| Other                                                                    | 2 (1.9%)        | 4 (12.1%)              | 6 (4.3%)           |
| <b>Ethnicity, n (%)</b>                                                  |                 |                        |                    |
| Hispanic or Latino                                                       | 26 (24.3%)      | 5 (15.2%)              | 31 (22.1%)         |
| Not Hispanic or Latino                                                   | 81 (75.7%)      | 28 (84.8%)             | 109 (77.9%)        |
| <b>Fitzpatrick Skin Type, n (%)</b>                                      |                 |                        |                    |
| I                                                                        | 7 (6.5%)        | 1 (3.0%)               | 8 (5.7%)           |
| II                                                                       | 27 (25.2%)      | 8 (24.2%)              | 35 (25.0%)         |
| III                                                                      | 30 (28.0%)      | 10 (30.3%)             | 40 (28.6%)         |
| IV                                                                       | 24 (22.4%)      | 8 (24.2%)              | 32 (22.9%)         |
| V                                                                        | 10 (9.3%)       | 4 (12.1%)              | 14 (10.0%)         |
| VI                                                                       | 9 (8.4%)        | 2 (6.1%)               | 11 (7.9%)          |
| <b>Blinded Evaluator Galderma Chin Retrusion Scale Scores, n (%)</b>     |                 |                        |                    |
| 1: Mild Retrusion                                                        | 40 (37.4%)      | 16 (48.5%)             | 56 (40.0%)         |
| 2: Moderate Retrusion                                                    | 67 (62.6%)      | 17 (51.5%)             | 84 (60.0%)         |
| <b>Treating Investigator Galderma Chin Retrusion Scale Scores, n (%)</b> |                 |                        |                    |
| 1: Mild Retrusion                                                        | 42 (39.3%)      | 10 (30.3%)             | 52 (37.1%)         |
| 2: Moderate Retrusion                                                    | 65 (60.7%)      | 23 (69.7%)             | 88 (62.9%)         |

BMI = body mass index; max = maximum; min = minimum; n = number of subjects; SD = standard deviation
