# Supplementary figures and images for: A Randomized Trial to Assess Effectiveness and Safety of a Hyaluronic Acid Filler for Chin Augmentation and Correction of Chin Retrusion
Source: PubMed Central journal article supplement — Plast Reconstr Surg. 2022 Sep 20;150(6):1240–8. doi: 10.1097/PRS.0000000000009733 (PMC9698183; doi:10.1097/prs.0000000000009733), 2022-09-20

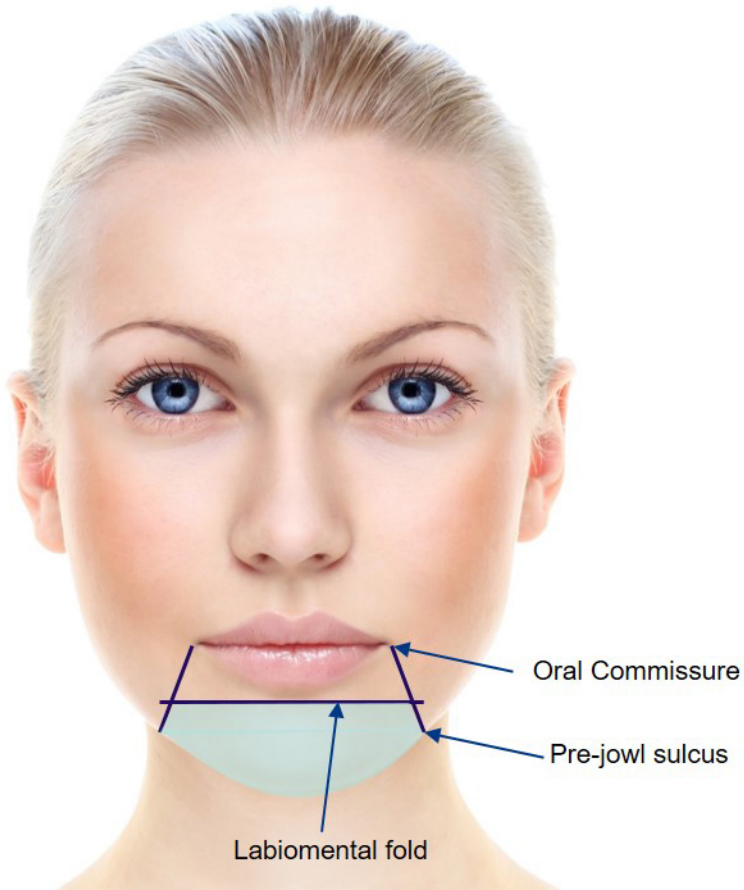

Oral Commissure

Pre-jowl sulcus

Labiomental fold

Supplement: prs-150-1240e-s001.pdf [file prs-150-1240e-s001.pdf]
